# Supplementary material
Source: PubMed Central journal article supplement (PMC3630877)
Supplement: supp_M112.414862_jbc.M112.414862-1.pdf [file supp_M112.414862_jbc.M112.414862-1.pdf]

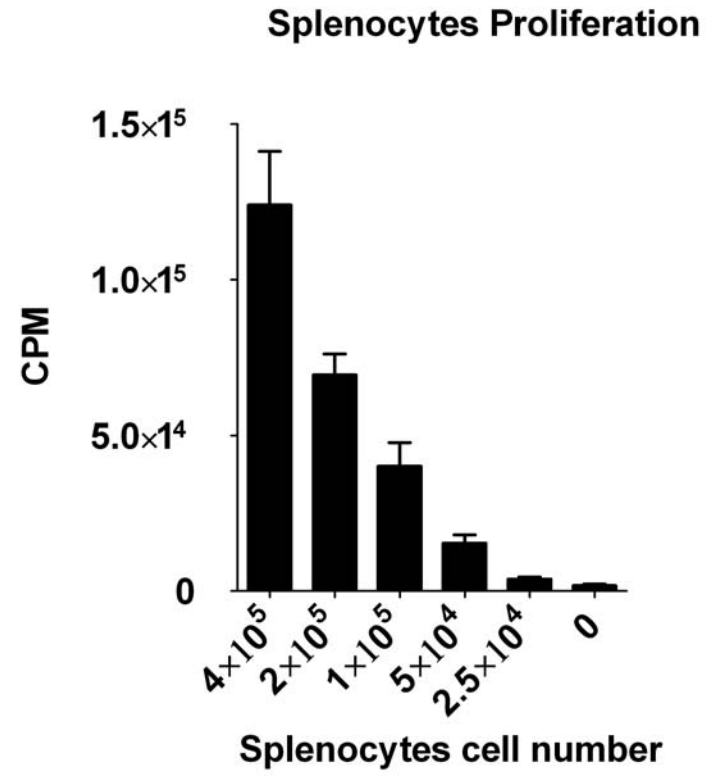

Supplemental Figure 1

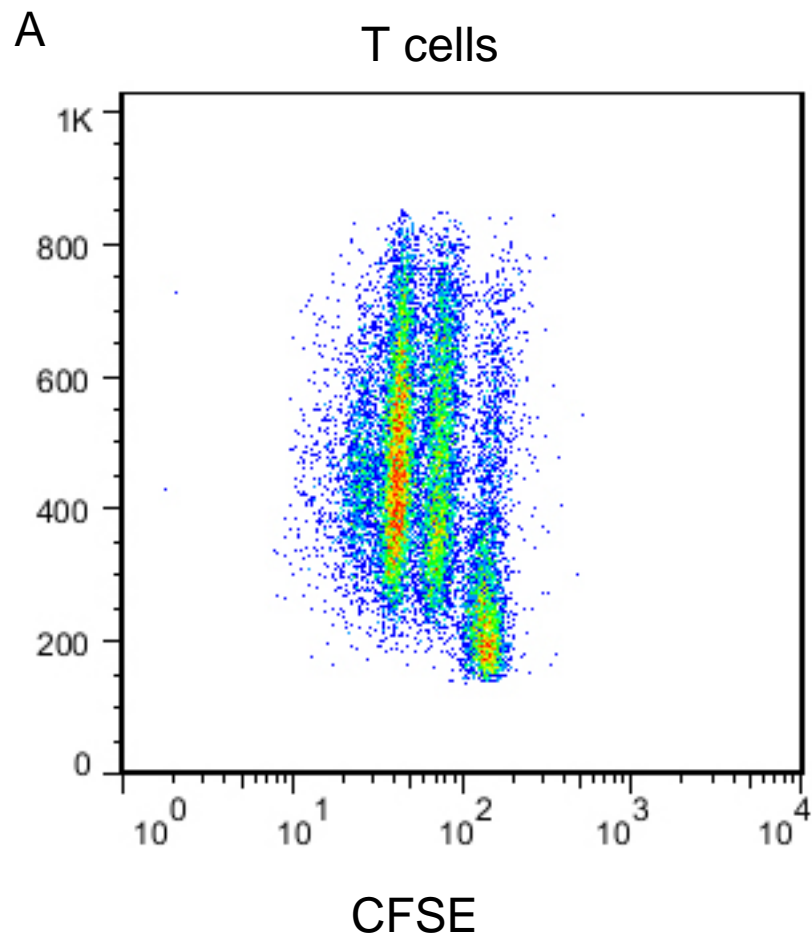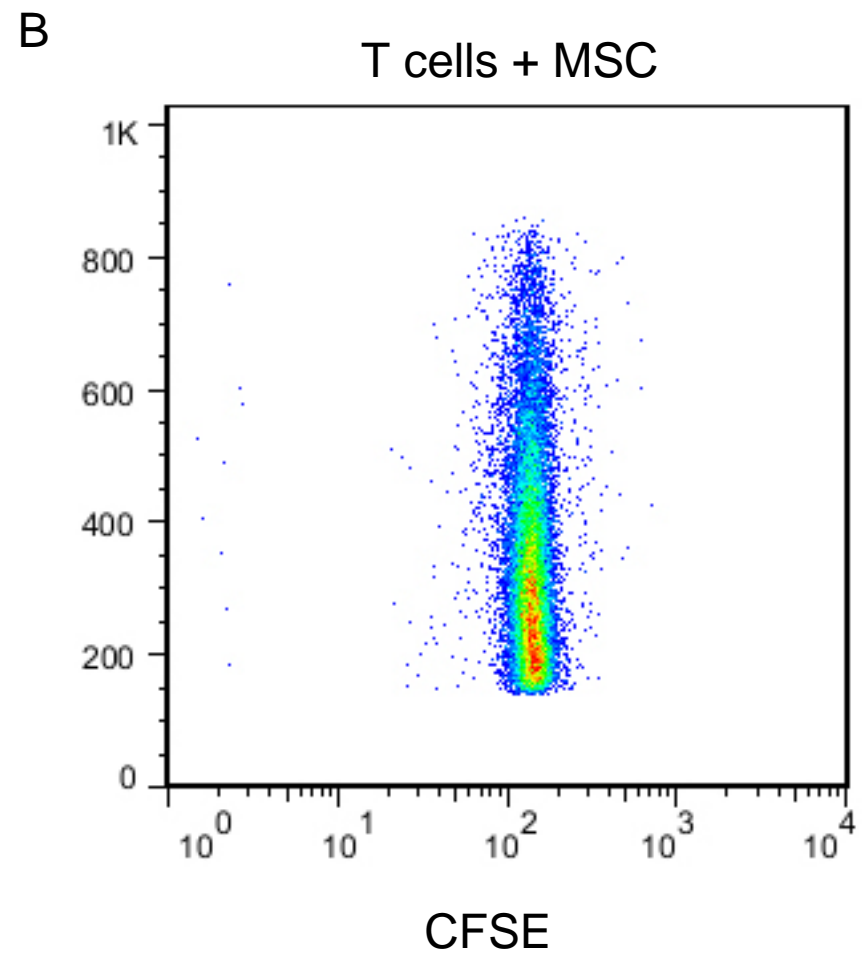

Supplemental Figure 2

A

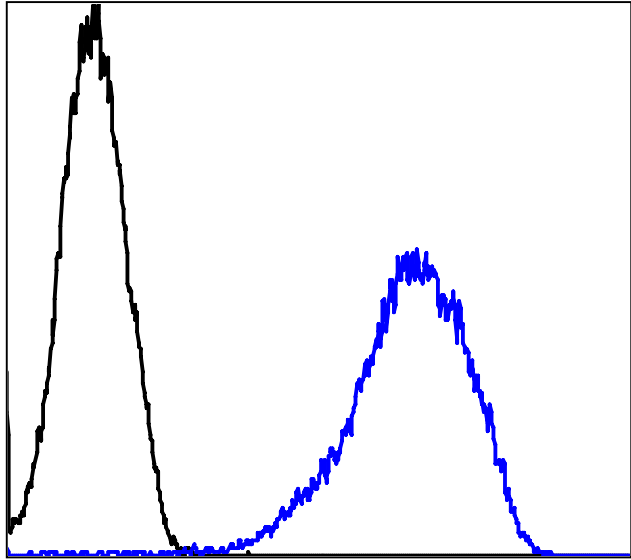

B

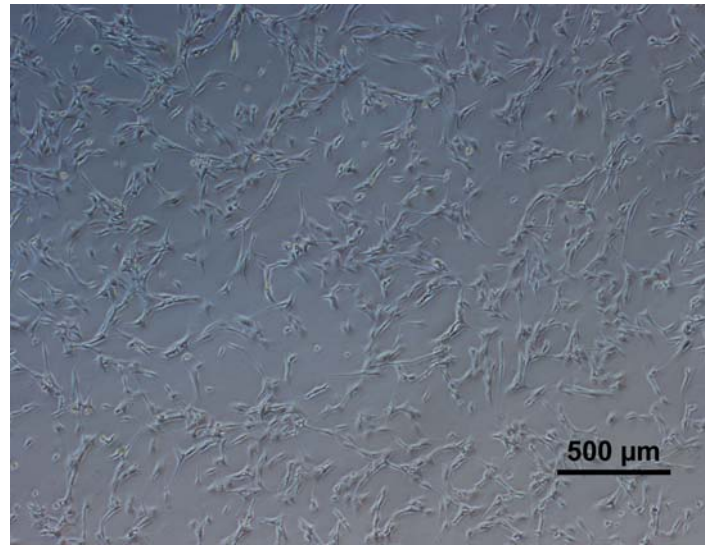

C

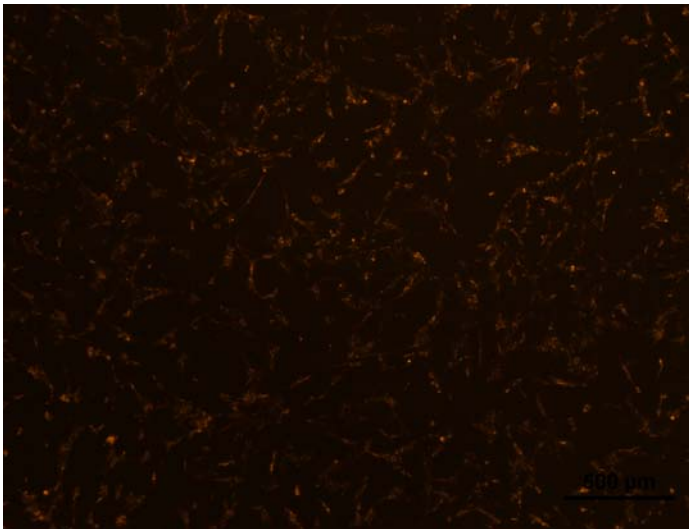

Supplemental Figure 3

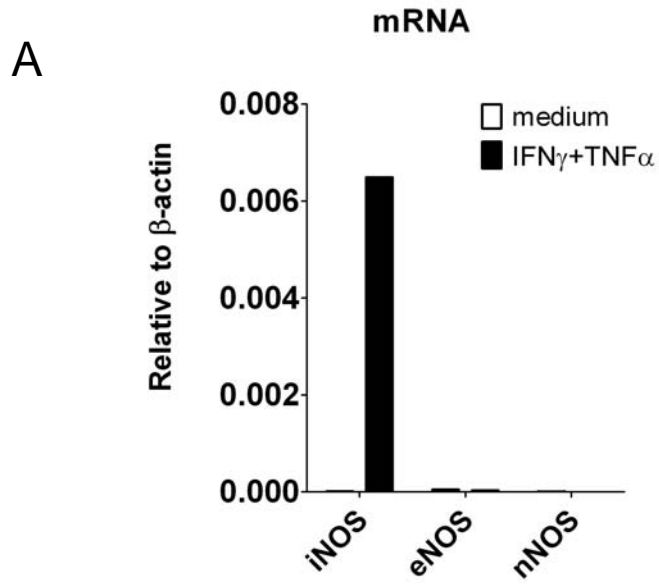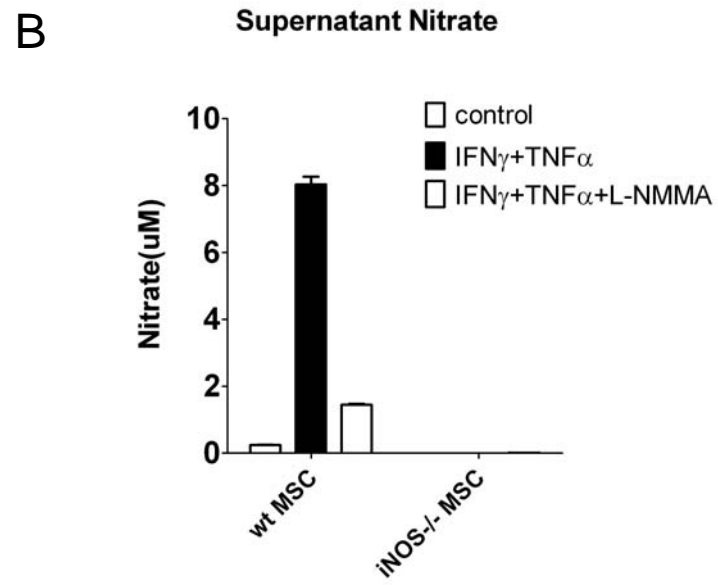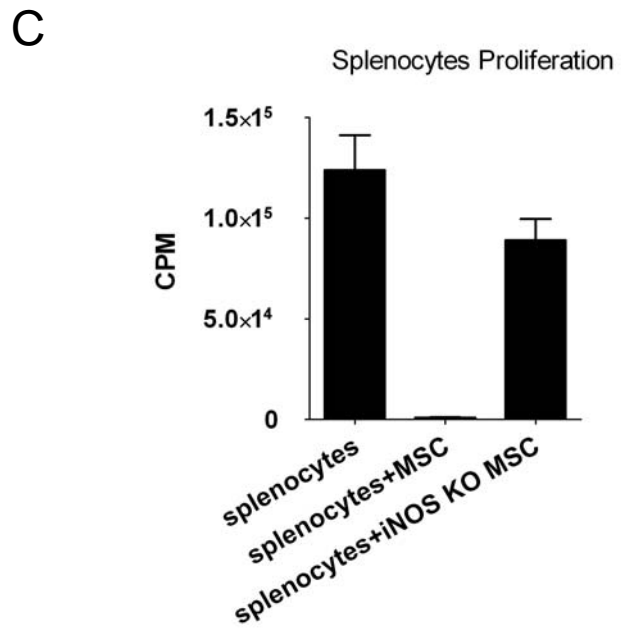

Supplemental Figure 4

### NF- $\kappa$ B Reporter Activity

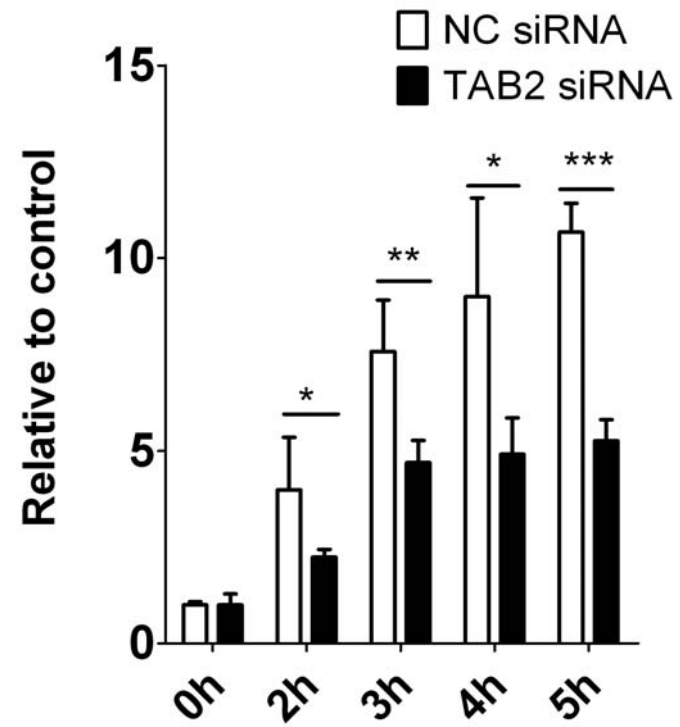

Supplemental Figure 5
