# Supplementary material
Source: PubMed Central journal article supplement (PMC3630877)
Supplement: supp_M112.414862_jbc.M112.414862-2.pdf [file supp_M112.414862_jbc.M112.414862-2.pdf]

**Supplemental Figure 1. Correlation between splenocyte number and <sup>3</sup>H-methyl thymidine incorporation.** Different number of splenocytes was seeded in 96-well plates with 1 μg/ml anti-CD3 and 1 μg/ml anti-CD28. After 48 h, 1 μCi of <sup>3</sup>H-methyl-thymidine was added to each well. After another 6 h, cells were frozen, thawed, and harvested. The radioactivity of incorporated <sup>3</sup>H-thymidine was measured by scintillation.

**Supplemental Figure 2. Direct inhibition of T cell proliferation by MSCs.**  $1 \times 10^4$  MSCs were seeded per well into 96-well plate. On the next day, T cells were isolated from mouse spleen with Pan T Cell Isolation Kit II from Miltenyi and labeled with CFSE. Then  $2 \times 10^5$  labeled T cells were added per well with 1 μg/ml anti-CD3 and 1 μg/ml anti-CD28. After 48 h, CFSE signal of T cells were examined by flow cytometry.

**Supplemental Figure 3. Intracellular localization of synthetic RNA.** **A.** MSCs were transfected with Cy3-labeled control miRNA mimics. 12h later, the cells were harvested upon trypsinization and analyzed for Cy3 presence by flow cytometry using a FACS Calibur. **B and C.** Microscopic demonstration of intracellular Cy3.

**Supplemental Figure 4. The Role of iNOS in MSC-mediated immunosuppression.**

**A.** Three NOS isoforms were analyzed by real time-PCR. **B.** Wild type MSCs and iNOS<sup>-/-</sup> MSCs were activated with 10 ng/ml IFN $\gamma$  and 10 ng/ml TNF $\alpha$  with or without iNOS inhibitor, L-NMMA for 24h. Supernatant nitrate was measured by Griess assay. **C.**  $1 \times 10^4$  wild type or iNOS<sup>-/-</sup> MSCs were seeded into 96-well plate. Supernatant was discarded and  $4 \times 10^5$  splenocytes were added per well with 1 μg/ml anti-CD3 and 1 μg/ml anti-CD28. After 48 h, 1 μCi of <sup>3</sup>H-methyl-thymidine was added to each well. After another 6 h, cells were frozen, thawed, and harvested. The radioactivity of incorporated <sup>3</sup>H-thymidine was measured by scintillation.

**Supplemental Figure 5. The regulatory role of TAB2 on NF- $\kappa$ B.** One hundred nanomolar of TAB2 siRNA or control siRNA was transfected into MSCs together with NF- $\kappa$ B reporter plasmid. Twelve hours later, MSCs were treated with 10 ng/ml IFN $\gamma$  and 10 ng/ml TNF $\alpha$  for various times. Cells were then collected and luciferase activity was determined.
